# Supplementary material
Source: publisher figshare collection journal article supplement (https://karger.figshare.com/ndownloader/files/6501342)

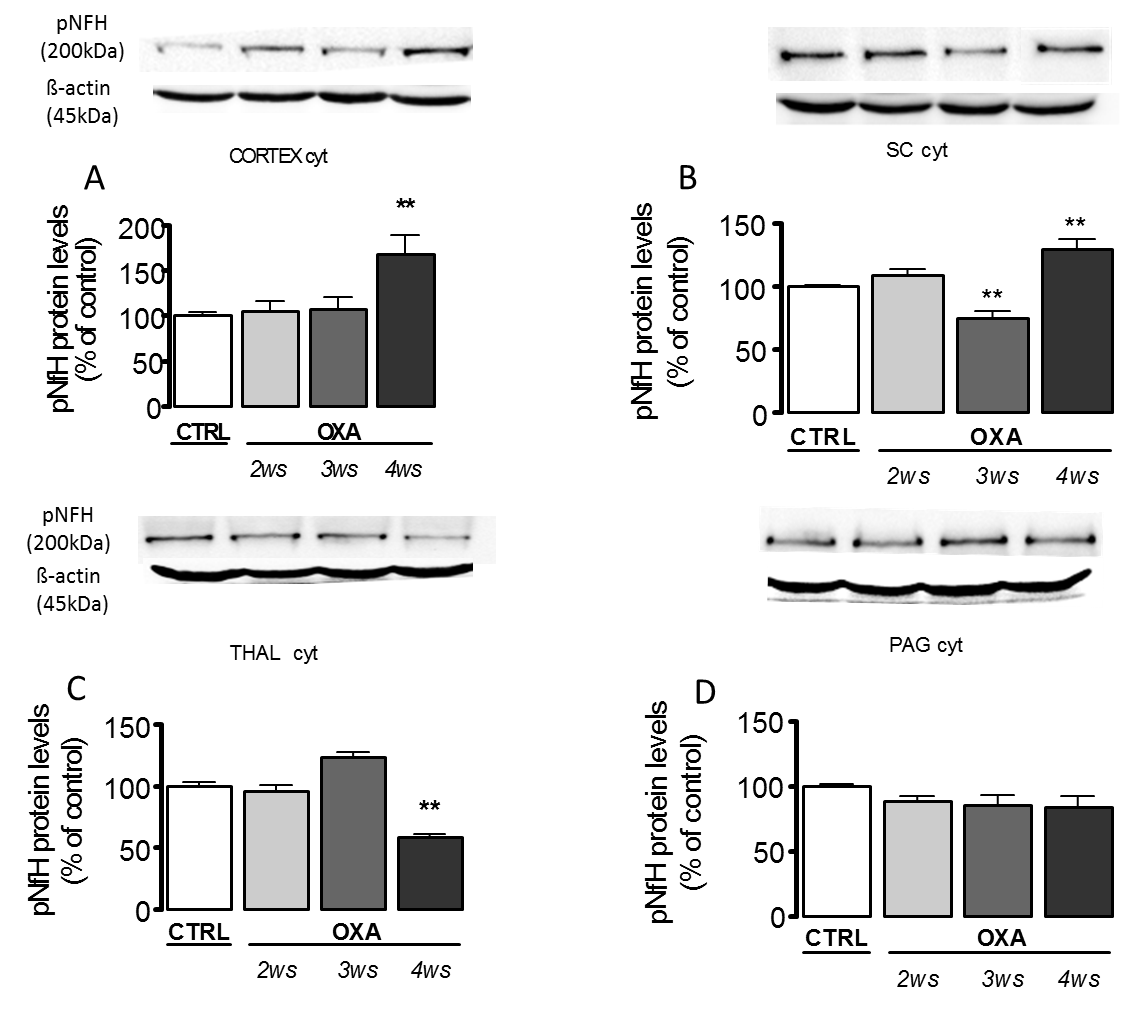

Supplement: Supplementary file 1 [file 6501342]
